# Supplementary material for: Population Genomics of the Critically Endangered Brazilian Merganser
Source: MDPI journal article supplement (doi:10.3390/ani13243759), 2023-12-06
Supplement: s1 [file s1]

# Population Genomics of the Critically Endangered Brazilian Merganser

Davidson P. Campos <sup>1</sup>, Henry Paul Granger-Neto <sup>1</sup>, José E. Santos Júnior <sup>1</sup>, Pierre Faux <sup>2</sup> and Fabrício R. Santos <sup>1,\*</sup>

<sup>1</sup> Department of Genetics, Ecology and Evolution, Instituto de Ciências Biológicas, Universidade Federal de Minas Gerais, Belo Horizonte 31270-901, MG, Brazil; davidsonpcampos@gmail.com (D.P.C.); hp.granger98@gmail.com (H.P.G.-N.); jrsantos140782@yahoo.com.br (J.E.S.J.)

<sup>2</sup> GenPhySE, Université de Toulouse, INRAE, ENVT, 31326 Castanet-Tolosan, France; pierre.faux@inrae.fr

\* Correspondence: fsantos@icb.ufmg.br

## Supporting information

**Table S1: List of samples used in this work and their respective occurrence areas, and geographic coordinates (lat/long).**

| Samples | Occurrence Area | Lat          | Long         |
|---------|-----------------|--------------|--------------|
| JAL202  | Jalapão         | -10.630692   | -46.75354    |
| JAL203  | Jalapão         | -10.630692   | -46.75354    |
| JAL204  | Jalapão         | -10.630692   | -46.75354    |
| JAL205  | Jalapão         | -10.630692   | -46.75354    |
| VEA066  | Veadeiros       | -14.28388889 | -47.7975     |
| VEA069  | Veadeiros       | -14.28388889 | -47.7975     |
| VEA070  | Veadeiros       | -14.28388889 | -47.7975     |
| VEA071  | Veadeiros       | -14.28388889 | -47.7975     |
| PAR074  | Paranaíba       | -19.07055556 | -46.94333333 |
| PAR180  | Paranaíba       | -19.074486   | -46.938445   |
| PAR206  | Paranaíba       | -18.662724   | -47.066072   |
| PAR207  | Paranaíba       | -18.662724   | -47.066072   |
| PAR208  | Paranaíba       | -18.662724   | -47.066072   |
| PAR209  | Paranaíba       | -18.662724   | -47.066072   |
| PAR210  | Paranaíba       | -19.074486   | -46.938445   |
| CAN018  | Canastra        | -20.3225     | -46.47222222 |
| CAN023  | Canastra        | -20.31555556 | -46.52944444 |
| CAN035  | Canastra        | -20.32166667 | -46.50472222 |
| CAN038  | Canastra        | -20.32166667 | -46.50472222 |
| CAN098  | Canastra        | -20.321654   | -46.504038   |
| CAN099  | Canastra        | -20.321654   | -46.504038   |
| CAN100  | Canastra        | -20.321654   | -46.504038   |
| CAN147  | Canastra        | -20.334125   | -46.468472   |
| CAN148  | Canastra        | -20.323391   | -46.501575   |
| CAN151  | Canastra        | -20.252688   | -46.622608   |
| CAN155  | Canastra        | -20.252688   | -46.622608   |
| CAN159  | Canastra        | -20.252688   | -46.622608   |
| CAN198  | Canastra        | -20.352173   | -46.347669   |
| CAN200  | Canastra        | -20.352173   | -46.347669   |
| CAN211  | Canastra        | -20.321654   | -46.504038   |

**Table S2: Pairwise kinship between sequenced individuals.**

\*Values of kinship between 0.0442 and 0.0884 are in the theoretical range of 3rd-degree relatives, values between 0.0884 and 0.177 are 2nd-degree relatives, and values between 0.177 and 0.354 are 1st-degree relatives. Values above 0.354 are monozygotic twins, or more likely in the case of birds, the same individuals.

|        | CAN018  | VEA069  | VEA070  | PAR210  | PAR206  | JAL203  | PAR207  | JAL202  | JAL204  | CAN200  | CAN147  | CAN211  | CAN035  | JAL205  | PAR209  | VEA071  | PAR208  | PAR074  | PAR180 | CAN098  | CAN155  | CAN148  | CAN038  | VEA066  | CAN100  | CAN159  | CAN099  | CAN023 | CAN151 | CAN198 |
|--------|---------|---------|---------|---------|---------|---------|---------|---------|---------|---------|---------|---------|---------|---------|---------|---------|---------|---------|--------|---------|---------|---------|---------|---------|---------|---------|---------|--------|--------|--------|
| CAN018 | 0.5000  | -       | -       | -       | -       | -       | -       | -       | -       | -       | -       | -       | -       | -       | -       | -       | -       | -       | -      | -       | -       | -       | -       | -       | -       | -       | -       | -      | -      | -      |
| VEA069 | -0.3256 | 0.5000  | -       | -       | -       | -       | -       | -       | -       | -       | -       | -       | -       | -       | -       | -       | -       | -       | -      | -       | -       | -       | -       | -       | -       | -       | -       | -      | -      | -      |
| VEA070 | -0.1212 | 0.0538  | 0.5000  | -       | -       | -       | -       | -       | -       | -       | -       | -       | -       | -       | -       | -       | -       | -       | -      | -       | -       | -       | -       | -       | -       | -       | -       | -      | -      | -      |
| PAR210 | -0.1055 | -0.2489 | -0.0745 | 0.5000  | -       | -       | -       | -       | -       | -       | -       | -       | -       | -       | -       | -       | -       | -       | -      | -       | -       | -       | -       | -       | -       | -       | -       | -      | -      | -      |
| PAR206 | -0.3631 | -0.5780 | -0.2625 | -0.1990 | 0.5000  | -       | -       | -       | -       | -       | -       | -       | -       | -       | -       | -       | -       | -       | -      | -       | -       | -       | -       | -       | -       | -       | -       | -      | -      | -      |
| JAL203 | -0.2033 | -0.2737 | -0.0143 | -0.1304 | -0.2639 | 0.5000  | -       | -       | -       | -       | -       | -       | -       | -       | -       | -       | -       | -       | -      | -       | -       | -       | -       | -       | -       | -       | -       | -      | -      | -      |
| PAR207 | -0.2617 | -0.4234 | -0.1908 | -0.1156 | 0.2075  | -0.1593 | 0.5000  | -       | -       | -       | -       | -       | -       | -       | -       | -       | -       | -       | -      | -       | -       | -       | -       | -       | -       | -       | -       | -      | -      | -      |
| JAL202 | -0.3064 | -0.3187 | -0.0277 | -0.2203 | -0.4148 | 0.2426  | -0.2824 | 0.5000  | -       | -       | -       | -       | -       | -       | -       | -       | -       | -       | -      | -       | -       | -       | -       | -       | -       | -       | -       | -      | -      | -      |
| JAL204 | -0.1956 | -0.2337 | 0.0086  | -0.0931 | -0.2943 | 0.2674  | -0.1962 | 0.2540  | 0.5000  | -       | -       | -       | -       | -       | -       | -       | -       | -       | -      | -       | -       | -       | -       | -       | -       | -       | -       | -      | -      | -      |
| CAN200 | -0.0154 | -0.1813 | 0.0136  | -0.0392 | -0.1659 | -0.0672 | -0.0689 | -0.1198 | -0.0442 | 0.5000  | -       | -       | -       | -       | -       | -       | -       | -       | -      | -       | -       | -       | -       | -       | -       | -       | -       | -      | -      | -      |
| CAN147 | -0.0549 | -0.2125 | -0.0306 | -0.0451 | -0.1091 | -0.1017 | -0.0501 | -0.1677 | -0.0829 | 0.0967  | 0.5000  | -       | -       | -       | -       | -       | -       | -       | -      | -       | -       | -       | -       | -       | -       | -       | -       | -      | -      | -      |
| CAN211 | -0.0661 | -0.2500 | 0.0052  | -0.1053 | -0.1934 | -0.0693 | -0.1274 | -0.1155 | -0.0380 | 0.1842  | 0.0263  | 0.5000  | -       | -       | -       | -       | -       | -       | -      | -       | -       | -       | -       | -       | -       | -       | -       | -      | -      | -      |
| CAN035 | -0.0633 | -0.1387 | 0.0169  | -0.0136 | -0.1806 | -0.1145 | -0.0892 | -0.1706 | -0.0916 | 0.0672  | 0.0907  | -0.0075 | 0.5000  | -       | -       | -       | -       | -       | -      | -       | -       | -       | -       | -       | -       | -       | -       | -      | -      | -      |
| JAL205 | -0.2291 | -0.1795 | 0.0477  | -0.1198 | -0.2916 | 0.2885  | -0.1632 | 0.0252  | 0.2897  | -0.0512 | -0.0786 | -0.0414 | -0.0982 | 0.5000  | -       | -       | -       | -       | -      | -       | -       | -       | -       | -       | -       | -       | -       | -      | -      | -      |
| PAR209 | -0.3614 | -0.5267 | -0.2355 | -0.1749 | 0.1133  | -0.2120 | 0.1990  | -0.3502 | -0.2171 | -0.1171 | -0.1063 | -0.2112 | -0.1509 | -0.2326 | 0.5000  | -       | -       | -       | -      | -       | -       | -       | -       | -       | -       | -       | -       | -      | -      | -      |
| VEA071 | -0.2735 | -0.0403 | 0.1347  | -0.1776 | -0.3527 | -0.1230 | -0.2383 | -0.1585 | -0.0918 | -0.0668 | -0.1113 | -0.1147 | -0.0498 | -0.0595 | -0.3230 | 0.5000  | -       | -       | -      | -       | -       | -       | -       | -       | -       | -       | -       | -      | -      | -      |
| PAR208 | -0.1966 | -0.3043 | -0.1138 | -0.0557 | 0.1940  | -0.1109 | 0.2982  | -0.2620 | -0.1520 | -0.0396 | -0.0059 | -0.0593 | -0.0197 | -0.1448 | 0.2129  | -0.1875 | 0.5000  | -       | -      | -       | -       | -       | -       | -       | -       | -       | -       | -      | -      | -      |
| PAR074 | -0.0564 | -0.1461 | 0.0185  | 0.1163  | -0.0448 | -0.0285 | 0.0289  | -0.0927 | -0.0164 | 0.0921  | 0.0469  | 0.0688  | 0.0682  | -0.0054 | -0.0278 | -0.0679 | 0.0920  | 0.5000  | -      | -       | -       | -       | -       | -       | -       | -       | -       | -      | -      | -      |
| PAR180 | 0.0076  | -0.0776 | 0.0408  | 0.1661  | 0.0078  | 0.0185  | 0.0524  | -0.0522 | 0.0227  | 0.0788  | 0.0756  | 0.0710  | 0.0816  | 0.0370  | 0.0131  | -0.0147 | 0.0950  | 0.1911  | 0.5000 | -       | -       | -       | -       | -       | -       | -       | -       | -      | -      | -      |
| CAN098 | -0.0774 | -0.2138 | -0.0085 | -0.0611 | -0.1350 | -0.0676 | -0.0924 | -0.1285 | -0.0556 | 0.0385  | 0.0257  | 0.0265  | 0       | -0.0441 | -0.1441 | -0.1157 | -0.0458 | 0.0472  | 0.1179 | 0.5000  | -       | -       | -       | -       | -       | -       | -       | -      | -      | -      |
| CAN155 | -0.0549 | -0.2125 | -0.0306 | -0.0451 | -0.1091 | -0.1017 | -0.0501 | -0.1677 | -0.0829 | 0.0967  | 0.5000  | 0.0263  | 0.0907  | -0.0786 | -0.1063 | -0.1113 | -0.0059 | 0.0469  | 0.0756 | 0.0257  | 0.5000  | -       | -       | -       | -       | -       | -       | -      | -      | -      |
| CAN148 | -0.0239 | -0.1852 | 0.0135  | -0.0484 | -0.1816 | -0.0797 | -0.0825 | -0.1322 | -0.0492 | 0.2653  | 0.0939  | 0.2212  | 0.0610  | -0.0470 | -0.1392 | -0.0862 | -0.0333 | 0.0839  | 0.1178 | 0.0472  | 0.0939  | 0.5000  | -       | -       | -       | -       | -       | -      | -      | -      |
| CAN038 | -0.0449 | -0.1915 | -0.0484 | 0.006   | -0.2349 | -0.1468 | -0.1215 | -0.2220 | -0.1201 | 0.0409  | 0.0316  | -0.0556 | 0.2625  | -0.1285 | -0.1729 | -0.0983 | -0.0566 | 0.0533  | 0.0997 | -0.0411 | 0.0316  | 0.0368  | 0.5000  | -       | -       | -       | -       | -      | -      | -      |
| VEA066 | -0.1581 | -0.0696 | 0.1100  | -0.1111 | -0.2811 | -0.0058 | -0.2093 | -0.0505 | 0.0019  | -0.0258 | -0.0683 | -0.0837 | -0.0532 | 0.0314  | -0.2901 | 0.0563  | -0.1743 | -0.0511 | 0.0146 | -0.0334 | -0.0683 | -0.0438 | -0.0752 | 0.5000  | -       | -       | -       | -      | -      | -      |
| CAN100 | -0.0952 | -0.1953 | 0       | -0.0685 | -0.1221 | -0.0828 | -0.0667 | -0.1458 | -0.0794 | 0.0225  | 0.0150  | 0.0058  | 0.0205  | -0.0807 | -0.1208 | -0.0819 | -0.0163 | 0.0963  | 0.1184 | 0.2542  | 0.0150  | 0.0426  | -0.0057 | -0.0587 | 0.5000  | -       | -       | -      | -      | -      |
| CAN159 | -0.0907 | -0.2950 | -0.0362 | -0.1435 | -0.2005 | -0.1155 | -0.1332 | -0.1677 | -0.0809 | 0.2188  | 0.0156  | 0.2560  | 0.0058  | -0.0685 | -0.2353 | -0.1471 | -0.1045 | 0.0347  | 0.0324 | -0.0039 | 0.0156  | -0.0483 | -0.0737 | -0.1364 | -0.0522 | 0.5000  | -       | -      | -      | -      |
| CAN099 | -0.0244 | -0.0947 | 0.0360  | 0.0020  | -0.1609 | -0.0756 | -0.0823 | -0.1129 | -0.0316 | 0.0368  | 0.0552  | 0.0095  | 0.0678  | -0.0369 | -0.1425 | -0.0562 | -0.026  | 0.0874  | 0.1378 | 0.2537  | 0.0552  | 0.0710  | 0.0507  | 0.0074  | 0.2571  | -0.0434 | 0.5000  | -      | -      | -      |
| CAN023 | -0.0181 | -0.2179 | -0.0139 | -0.0060 | -0.1332 | -0.0923 | -0.1049 | -0.1288 | -0.0282 | 0.0616  | 0.0653  | 0.0327  | 0.0334  | -0.0617 | -0.1626 | -0.0664 | -0.0385 | 0.0904  | 0.1066 | 0.0600  | 0.0653  | 0.0517  | 0       | -0.0415 | 0.0230  | 0.0300  | 0.0584  | 0.5000 | -      | -      |
| CAN151 | 0.1797  | -0.2976 | -0.0966 | -0.0933 | -0.2447 | -0.1236 | -0.1885 | -0.2086 | -0.0890 | 0.0143  | -0.0041 | 0.0360  | -0.0183 | -0.1047 | -0.2668 | -0.2067 | -0.1124 | 0.0081  | 0.0374 | 0.0062  | -0.0041 | -0.0162 | -0.0293 | -0.1183 | -0.0274 | 0.0376  | 0.0021  | 0.1303 | 0.5000 | -      |
| CAN198 | -0.1045 | -0.2646 | -0.0560 | -0.1345 | -0.1552 | -0.1376 | -0.1303 | -0.1692 | -0.0923 | 0.1459  | 0       | 0.0602  | 0.0193  | -0.0897 | -0.1944 | -0.1782 | -0.1104 | 0.0365  | 0.0476 | -0.0215 | 0       | -0.0212 | -0.0873 | -0.1181 | -0.0300 | 0.2082  | -0.0098 | 0.0857 | 0.0286 | 0.5000 |

**Table S3: Individual inbreeding coefficients (F).** INDV = individual; O(HOM) = observed number of SNPs in homozygosity; O(HET) = observed number of SNPs in heterozygosity. The expected homozygosity was 659.7, the expected heterozygosity was 263.3 and the number of analyzed SNPs was 923.

| INDV   | O(HOM) | O(HET) | F        |
|--------|--------|--------|----------|
| JAL202 | 696    | 227    | 0.13776  |
| JAL203 | 676    | 247    | 0.06179  |
| JAL204 | 654    | 269    | -0.02177 |
| JAL205 | 650    | 273    | -0.03696 |
| VEA066 | 655    | 268    | -0.01797 |
| VEA069 | 717    | 206    | 0.21753  |
| VEA070 | 609    | 314    | -0.19270 |
| VEA071 | 658    | 265    | -0.00658 |
| PAR074 | 643    | 280    | -0.06355 |
| PAR180 | 575    | 348    | -0.32184 |
| PAR206 | 757    | 166    | 0.36947  |
| PAR207 | 718    | 205    | 0.22133  |
| PAR208 | 692    | 231    | 0.12257  |
| PAR209 | 736    | 187    | 0.28970  |
| PAR210 | 687    | 236    | 0.10358  |
| CAN018 | 742    | 181    | 0.31249  |
| CAN023 | 661    | 262    | 0.00482  |
| CAN035 | 646    | 277    | -0.05216 |
| CAN038 | 659    | 264    | -0.00278 |
| CAN098 | 652    | 271    | -0.02937 |
| CAN099 | 654    | 269    | -0.02177 |
| CAN100 | 663    | 260    | 0.01242  |
| CAN147 | 643    | 280    | -0.06355 |
| CAN148 | 709    | 214    | 0.18714  |
| CAN151 | 649    | 274    | -0.04076 |
| CAN155 | 685    | 238    | 0.09598  |
| CAN159 | 683    | 240    | 0.08838  |
| CAN198 | 649    | 274    | -0.04076 |
| CAN200 | 665    | 258    | 0.02001  |
| CAN211 | 664    | 259    | 0.01621  |

**Table S4: Analysis of Molecular Variance for different groupings of *Mergus octosetaceus* populations:** Serra da Canastra National Park (Canastra); Jalapão State Park (Jalapão); Chapada dos Veadeiros National Park (Veadeiros); Alto Paranaíba region (Paranaíba).

|                            | Run | Population groupings                     | Percentage of variation within populations | F <sub>ST</sub> | F <sub>SC</sub> | F <sub>CT</sub> |
|----------------------------|-----|------------------------------------------|--------------------------------------------|-----------------|-----------------|-----------------|
| All individuals            | 1   | Canastra+Paranaíba X Veadeiros X Jalapão | 81.53                                      | 0.1847          | 0.0979          | 0.0962          |
|                            | 2   | Canastra+Paranaíba X Veadeiros+Jalapão   | 82.51                                      | 0.1749          | 0.1261          | 0.0559          |
|                            | 3   | Canastra X Paranaíba X Veadeiros+Jalapão | 84.63                                      | 0.1538          | 0.1877          | -0.0418         |
| Only unrelated individuals | 1   | Canastra+Paranaíba X Veadeiros X Jalapão | 86.71                                      | 0.1329          | 0.0627          | 0.0750          |
|                            | 2   | Canastra+Paranaíba X Veadeiros+Jalapão   | 86.63                                      | 0.1337          | 0.0666          | 0.0718          |
|                            | 3   | Canastra X Paranaíba X Veadeiros+Jalapão | 89.10                                      | 0.1090          | 0.0818          | 0.0296          |
